# Supplementary material for: Cryo‐EM reconstruction of Type VI secretion system baseplate and sheath distal end
Source: PubMed Central journal article supplement (PMC5813253; doi:10.15252/embj.201797103), 2017-12-18
Supplement: EMBJ-37-e97103-s001.pdf [file EMBJ-37-e97103-s001.pdf]

# Table of contents

- Appendix Figure S1. **Symmetry analysis, localized connector refinement and homology to T4 gp10.**
- Appendix Figure S2. **Comparison of the T6SS baseplate with the T4 phage inner baseplate.**
- Appendix Figure S3. **Schematic representation of the genomic region encoding T6SS from *Vibrio cholerae*.**
- Appendix Table S1. **Cryo-EM data collection and processing.**
- Appendix Table S2. **Fitting of X-ray crystallographic structures into cryo-EM density maps of baseplate and cap.**
- Appendix Table S3. **Strains used in this study, related to Material and Methods.**

## Appendix Fig. S1

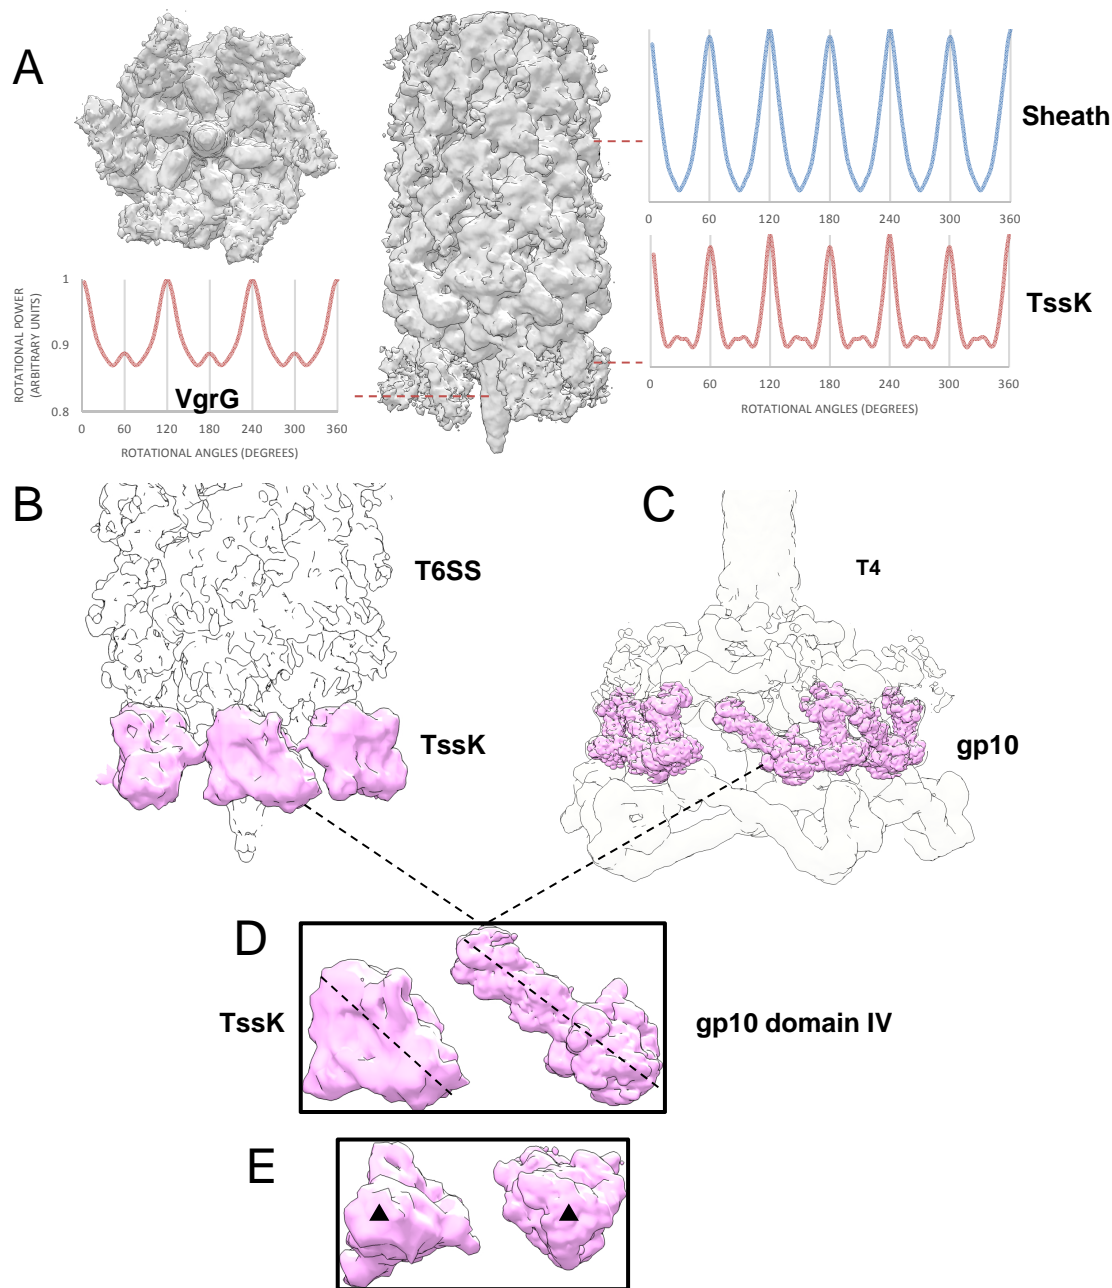

### Symmetry analysis, localized connector refinement and homology to T4 gp10.

(A). Bottom and side views of the 3-fold averaged sheath-baseplate reconstruction. Rotational power spectra of the cross sections through the sheath, wedge, and spike regions.

(B). Tilted view of the composite baseplate cryo-EM reconstruction, except for the disordered connector density, replaced by six copies of locally refined reconstruction colored in pink.

(C). Tilted view of the 12 Å T4 baseplate cryo-EM reconstruction (EMD-1048), with fitted upper peripheral baseplate (EMD-3394) colored in pink.

(D). Side views of the TssK connector protein and domain IV of T4 gp10 with three-fold symmetry axis highlighted with black dashed lines.

(E). View along three-fold symmetry axis of (D).

## Appendix Fig. S2

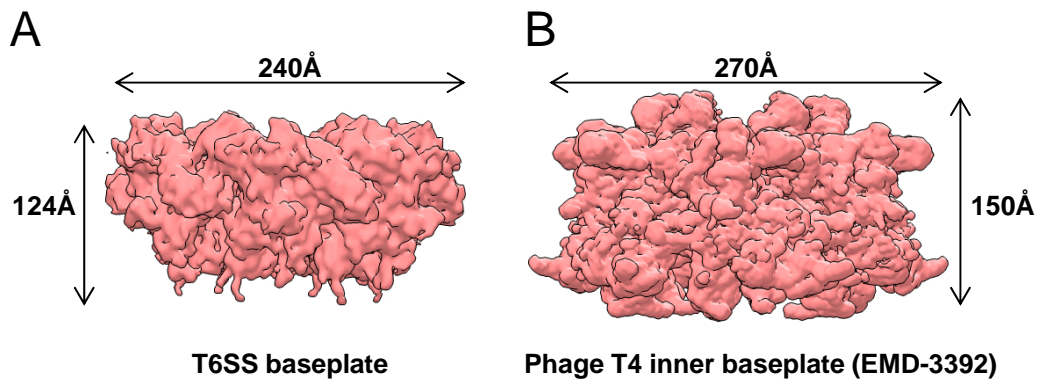

### **Comparison of the T6SS baseplate with the T4 phage inner baseplate.**

(A). Extracted putative baseplate of 8 Å T6SS sheath-baseplate reconstruction.

(B). Cryo-EM reconstruction of the T4 inner baseplate (EMD-3392) low-pass filtered to 8 Å.

## Appendix Fig. S3

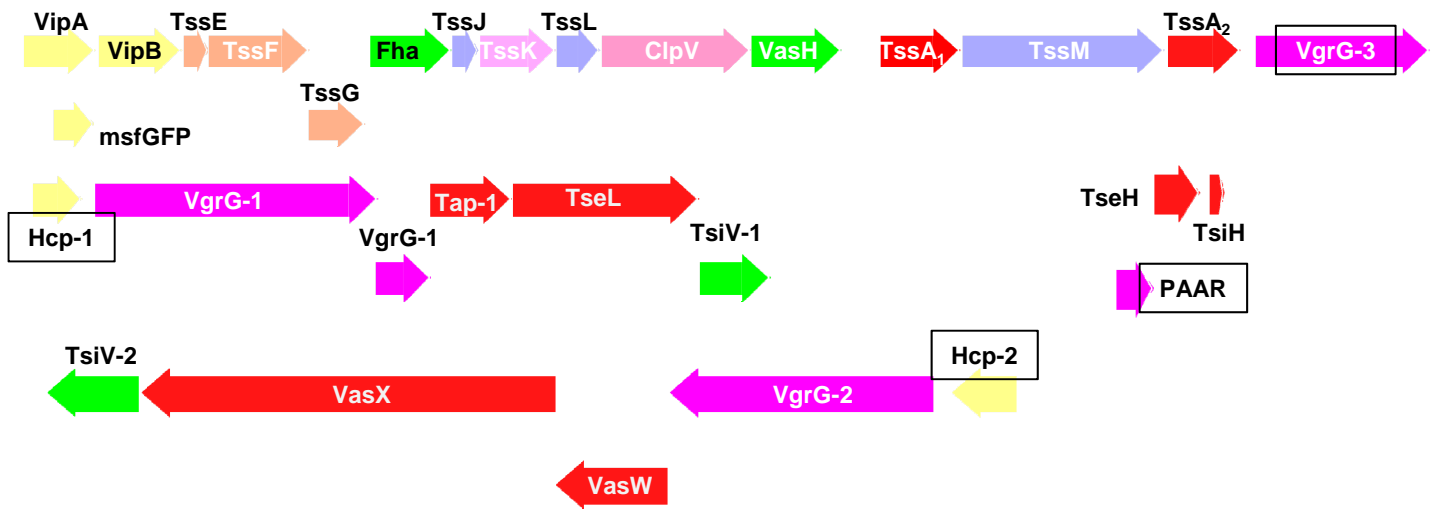

### Schematic representation of the genomic region encoding T6SS from *Vibrio cholerae*.

Main cluster with VgrG-3, and three auxiliary clusters – Hcp-1, Hcp-2 and PAAR are shown. Baseplate, membrane complex, cap, effectors, adaptors, immunity and regulatory proteins are shown.

**Appendix Table S1. Cryo-EM data collection and processing.**

| T6S Part          | Symmetry         | Movies       |          | Particles    |          |       |          |          |                    | Pixel size, Å | Resolution, Å | Software                                 |
|-------------------|------------------|--------------|----------|--------------|----------|-------|----------|----------|--------------------|---------------|---------------|------------------------------------------|
|                   |                  | Non Hcp lim. | Hcp lim. | Non Hcp lim. |          |       | Hcp lim. |          | Final 3DR Combined |               |               |                                          |
|                   |                  |              |          | Picked       | After 2D | 3D    | Picked   | After 2D |                    |               |               |                                          |
| <b>Baseplate</b>  | C6/C3            | 6,603        | 2,599    | 21,446       | 8,309    | 2,660 | 12,832   | 3,241    | 1,265              | 2.12          | 8/11          | MotionCorr2, Gctf, Scipion, RELION1.4, 2 |
| <b>Distal end</b> | C6               |              |          |              |          | 3,710 |          |          | 3,710*             |               |               |                                          |
| <b>TssK</b>       | C6-C1 relaxation | -            |          |              |          |       |          | 3,600    | 10                 |               | RELION2       |                                          |

\* Final 3D refinement with particles from non-Hcp limited cells only.

**Appendix Table S2. Fitting of X-ray crystallographic structures into cryo-EM density maps of baseplate and distal end.**

| <b>Model</b>                   | <b>PDB</b> | <b>% atoms</b> | <b>Correlation coefficient</b> |
|--------------------------------|------------|----------------|--------------------------------|
| Sheath ring 1                  | 5MXN       | 87             | 0.87                           |
| Ring 1 refitted                |            | 90             | 0.89                           |
| Ring 2                         |            | 86             | 0.86                           |
| Ring 3                         |            | 89             | 0.88                           |
| Ring 4                         |            | 91             | 0.89                           |
| Ring 5                         |            | 91             | 0.90                           |
| VgrG/PAAR C6                   | 4MTK/4JIV  | 88             | 0.88                           |
| VgrG/PAAR C3                   |            | 94             | 0.93                           |
| Ring N (topmost)               | 5MXN       | 76             | 0.79                           |
| Ring N refitted                |            | 84             | 0.86                           |
| Ring (N-1)                     |            | 90             | 0.87                           |
| Hcp N (topmost)                | 5MXN*      | 60             | 0.87                           |
| Hcp N-1                        |            | 77             | 0.90                           |
| Hcp N-2                        |            | 90             | 0.95                           |
| VipA/VipB only into distal end | 5MXN**     | 73             | 0.82                           |
| TssK                           | 5M30       | 66             | 0.92                           |

\* Hcp tube and \*\*VipA/VipB sheath models were extracted from complete sheath-tube model (PDB 5MXN).

**Appendix Table S3. Strains used in this study, related to Material and Methods.**

| Organism                          | Genotype                                                                                                                                                                                                                                                                           | Plasmid                | Relevant features                                                                                                            | Source                    |
|-----------------------------------|------------------------------------------------------------------------------------------------------------------------------------------------------------------------------------------------------------------------------------------------------------------------------------|------------------------|------------------------------------------------------------------------------------------------------------------------------|---------------------------|
| <i>V. cholerae</i> 2740-80        | <i>lacZ</i> <sup>-</sup> , <i>Str</i> <sup>r</sup> , <i>vipA-msfGFP</i>                                                                                                                                                                                                            |                        | C-terminal chromosomal fusion of <i>msfGFP</i> to <i>vipA</i>                                                                | (Kudryashev et al., 2015) |
|                                   | <i>lacZ</i> <sup>-</sup> , <i>Str</i> <sup>r</sup> , $\Delta$ <i>vipA</i> , $\Delta$ <i>flgG</i>                                                                                                                                                                                   | pBAD24- <i>vipA</i>    | Complementation of <i>vipA</i> deletion from inducible vector; Amp <sup>r</sup>                                              | (Brackmann et al., 2017)  |
|                                   | <i>lacZ</i> <sup>-</sup> , <i>Str</i> <sup>r</sup> , $\Delta$ <i>vipA</i> , $\Delta$ <i>flgG</i>                                                                                                                                                                                   | pBAD24- <i>vipA-N3</i> | Complementation of <i>vipA</i> deletion from inducible vector; Amp <sup>r</sup>                                              |                           |
|                                   | <i>lacZ</i> <sup>-</sup> , <i>Str</i> <sup>r</sup> , <i>vipA-msfGFP</i> , $\Delta$ <i>hcp1</i> , $\Delta$ <i>hcp2</i>                                                                                                                                                              |                        | Deletion of both <i>hcp</i> variants in <i>vipA-msfGFP</i> background                                                        | (Vettiger et al., 2016)   |
|                                   | <i>lacZ</i> <sup>-</sup> , <i>Str</i> <sup>r</sup> , <i>vipA-msfGFP</i> , $\Delta$ <i>hcp1</i> , $\Delta$ <i>hcp2</i> , $\Delta$ <i>flgG</i>                                                                                                                                       |                        | <i>flgG</i> deletion in <i>hcp</i> mutant background                                                                         | this study                |
|                                   | <i>lacZ</i> <sup>-</sup> , <i>Str</i> <sup>r</sup> , <i>vipA-msfGFP</i> , $\Delta$ <i>hcp1</i> , $\Delta$ <i>hcp2</i> , $\Delta$ <i>flgG</i>                                                                                                                                       | pBAD24- <i>hcp2</i>    | Complementation of <i>hcp</i> deletion from inducible vector; Amp <sup>r</sup>                                               |                           |
|                                   | <i>lacZ</i> <sup>-</sup> , <i>Str</i> <sup>r</sup> , <i>vipA-N3-msfGFP</i> , $\Delta$ <i>hcp1</i> , $\Delta$ <i>hcp2</i> , $\Delta$ <i>flgG</i>                                                                                                                                    |                        | Chromosomal integration of <i>vipA-N3-msfGFP</i> in <i>hcp</i> / <i>flgG</i> deletion background                             |                           |
|                                   | <i>lacZ</i> <sup>-</sup> , <i>Str</i> <sup>r</sup> , <i>vipA-N3-msfGFP</i> , $\Delta$ <i>hcp1</i> , $\Delta$ <i>hcp2</i> , $\Delta$ <i>flgG</i>                                                                                                                                    | pBAD24- <i>hcp2</i>    | Complementation of <i>hcp</i> deletion in <i>vipA-N3-msfGFP</i> background from inducible vector; Amp <sup>r</sup>           |                           |
| <i>E. coli</i> SM10 $\lambda$ pir | Km <sup>r</sup> , <i>thi-1</i> , <i>thr</i> , <i>leu</i> , <i>tonA</i> , <i>lacY</i> , <i>supE</i> , <i>recA::RP4-2-Tc::Mu</i> , <i>pir</i>                                                                                                                                        | pWM91                  | Allelic replacement vector used for all in-frame deletions by conjugation; <i>sacB</i> , Amp <sup>r</sup> /Gent <sup>r</sup> |                           |
| DH5 $\alpha$ $\lambda$ pir        | F <sup>-</sup> , <i>endA1</i> , <i>glnV44</i> , <i>thi-1</i> , <i>recA1</i> , <i>relA1</i> , <i>gyrA96</i> , <i>deoR</i> , <i>nupG</i> , $\Phi$ 80d <i>lacZ</i> $\Delta$ M15, ( <i>lacZYA-argF</i> )U169, <i>hsdR17</i> (rK <sup>-</sup> mK <sup>+</sup> ), $\lambda$ <sup>-</sup> |                        | Cloning strain                                                                                                               |                           |
